# Supplementary material
Source: PubMed Central journal article supplement (PMC3204097)

**SUPPLEMENTAL FIGURE 1**

**A**

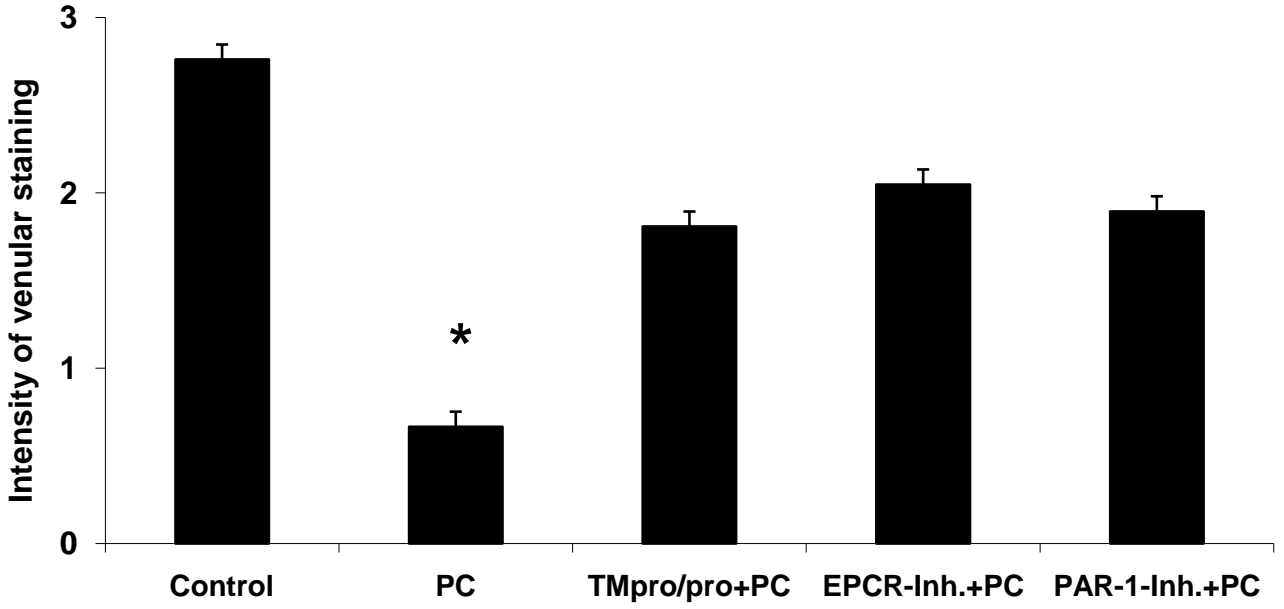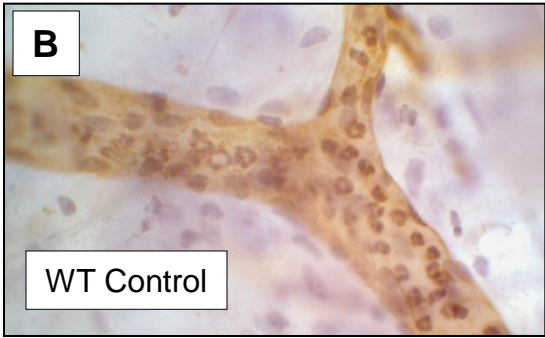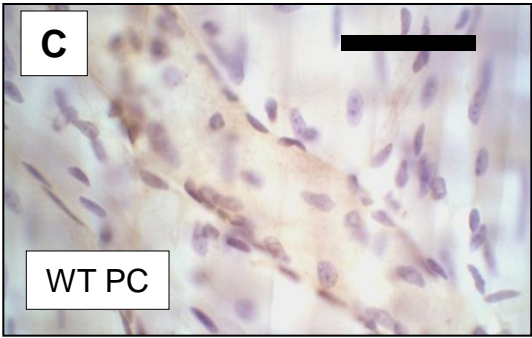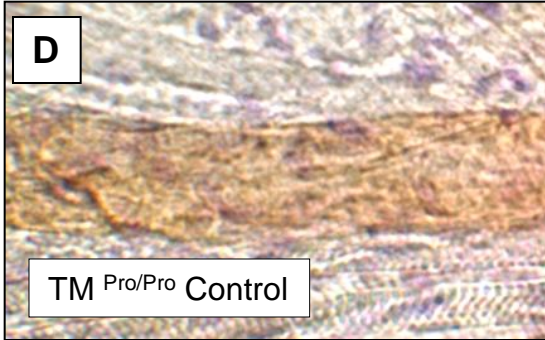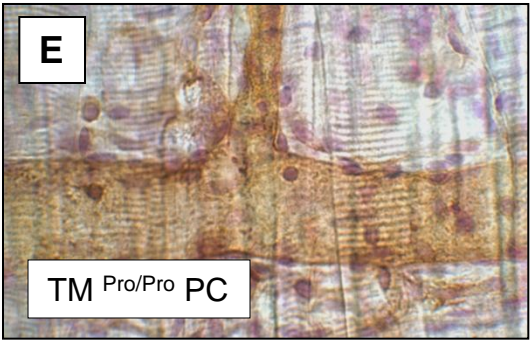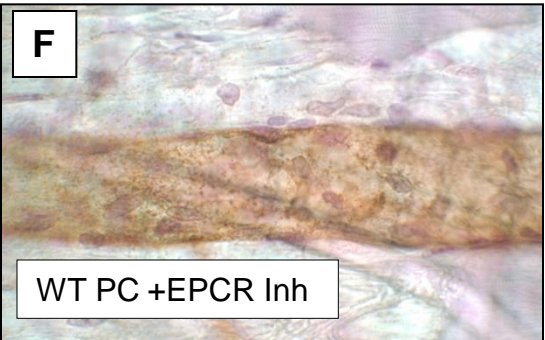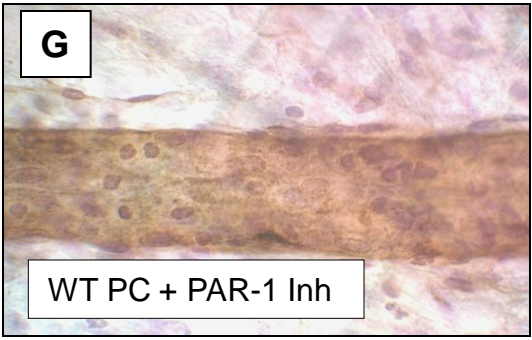

Supplement: mmc6.pdf [file mmc6.pdf]

# SUPPLEMENTAL FIGURE 2

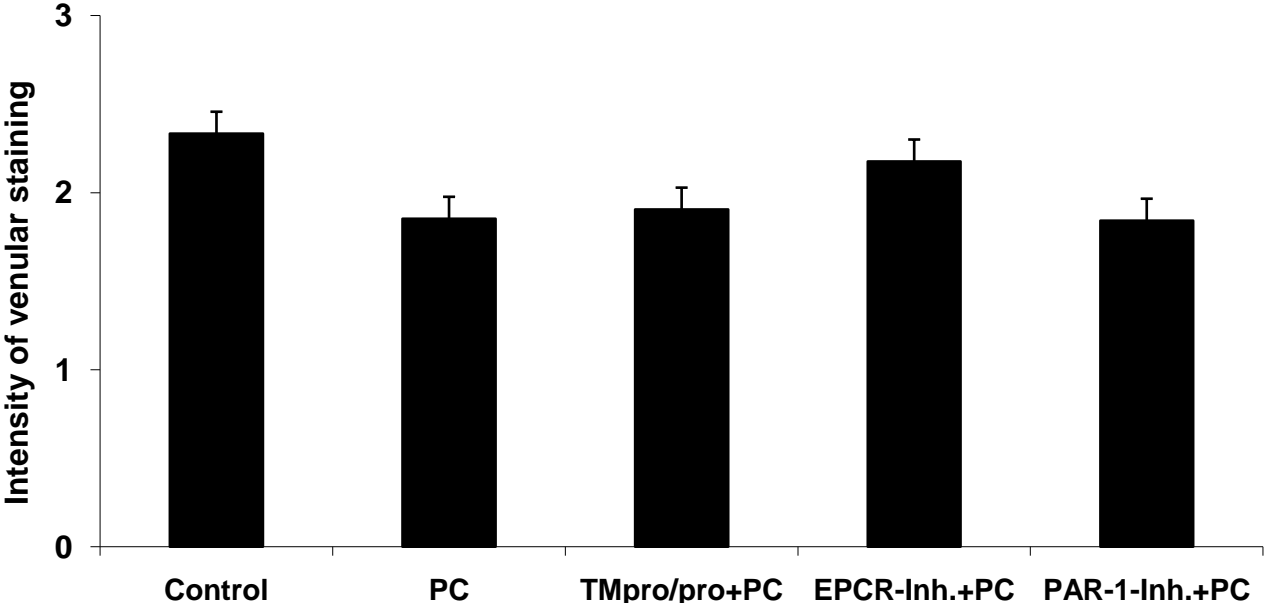

Supplement: mmc7.pdf [file mmc7.pdf]
